# Supplementary material
Source: PubMed Central journal article supplement (PMC3699109)
Supplement: supp_126.13.2955_JCS128744.pdf [file supp_126.13.2955_JCS128744.pdf]

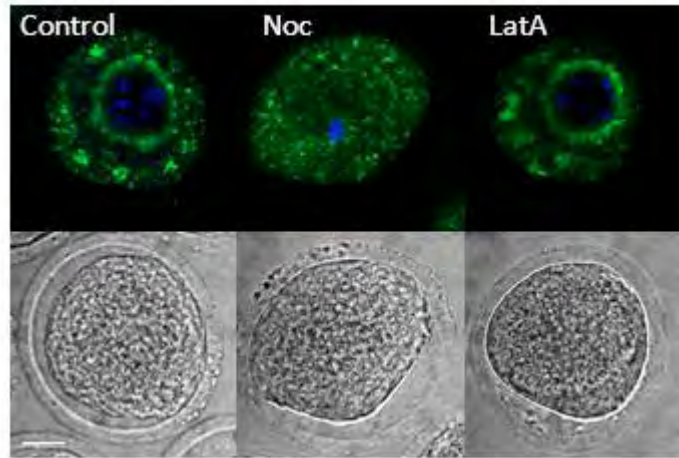

**Fig. S1.** Mitochondrial accumulation around the spindle is disrupted by nocodazole but not latrunculin A. GV oocytes were released from meiotic arrest and transferred into media containing either vehicle control (Con), 10  $\mu$ M nocodazole (Noc) or 6  $\mu$ M latrunculin A (LatA), and matured for 6 hours prior to fixing and staining for mitochondria (green) and DNA (blue). LatA-treated oocytes (n=13) displayed a mitochondrial distribution indistinguishable from that of control oocytes (n=32) whereas nocodazole-treated oocytes failed to display the characteristic mitochondrial ring (n=23).

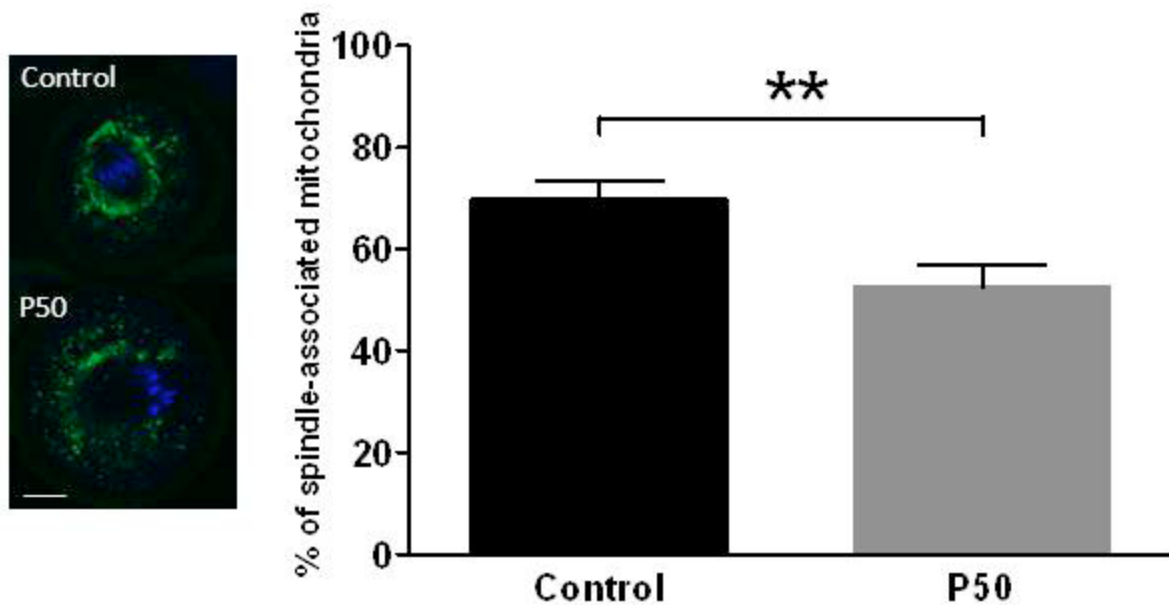

**Fig. S2.** Mitochondrial accumulation around the spindle is disrupted by overexpression of p50. Oocytes were microinjected with either p50-EGFP (n=15) or vehicle control (=19) and incubated overnight at GV stage to allow overexpression. Oocytes were subsequently released and fixed at 6 hours and stained for mitochondria (green). Oocytes in which dynein activity was inhibited by overexpression of p50 had reduced accumulation of mitochondria around the spindle ( $P < 0.01$ ).

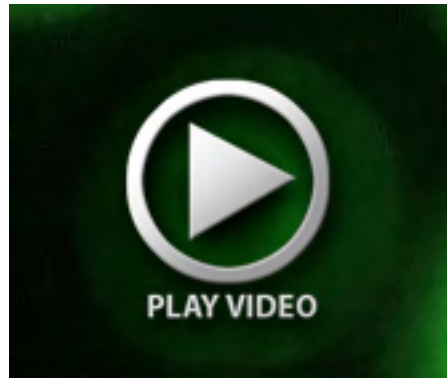

**Movie 1.** Mitochondria are associated with presumed MTOCs during oocyte maturation. Live time-lapse imaging of mitochondria (green) shows their association with presumed MTOCs (see also Fig. S2), which move towards and join the spindle associated mitochondrial ring during oocyte maturation.

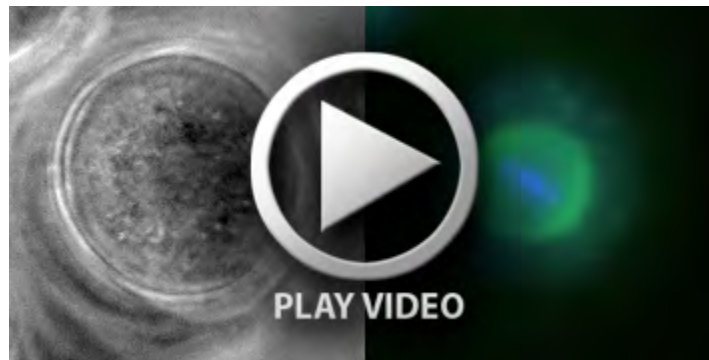

**Movie 2.** Mitochondria are retained in the oocyte during polar body extrusion. Live time-lapse imaging of mitochondria (green) and DNA (blue) shows that mitochondria distribute asymmetrically during polar body extrusion.

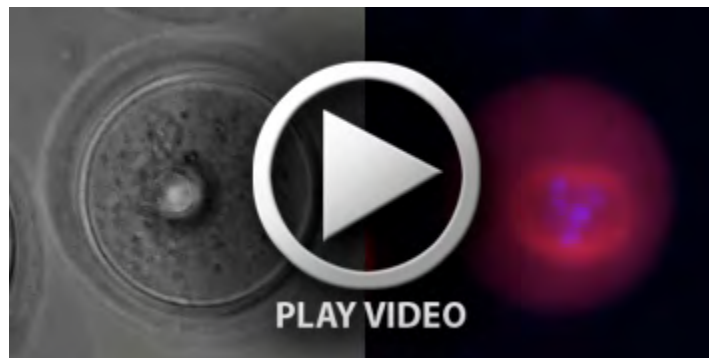

**Movie 3.** ER is retained in the oocyte during polar body extrusion. Live time-lapse imaging of ER (red) and DNA (blue) shows that mitochondria distribute asymmetrically during polar body extrusion. The oil droplet from DiI microinjection is visible in the brightfield images

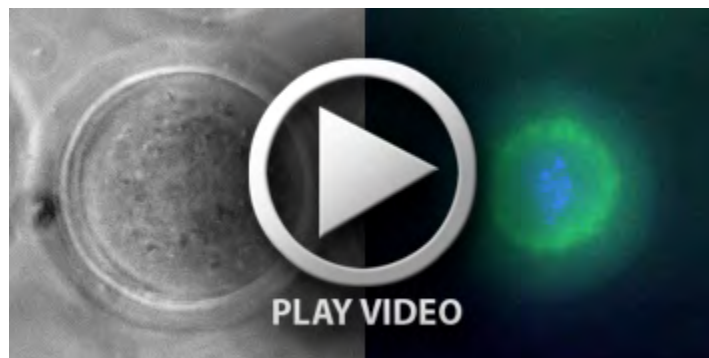

**Movie 4.** Asymmetry does not develop in the presence of LatA. Live time-lapse imaging of mitochondria (green) and DNA (blue) shows that mitochondria remain symmetrically distributed when spindle migration is prevented with 6  $\mu$ M LatA.

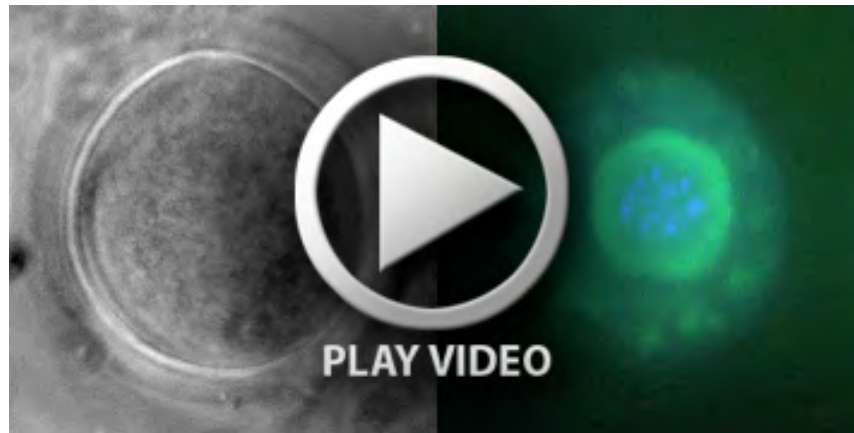

**Movie 5.** Asymmetry does not develop in the presence of CK-666. Live time-lapse imaging of mitochondria (green) and DNA (blue) shows that mitochondria remain symmetrically distributed when spindle migration is prevented with 100  $\mu\text{M}$  CK-666.

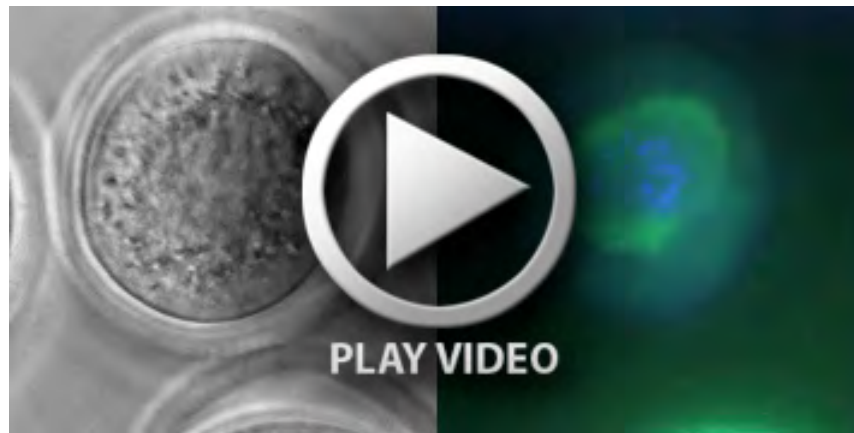

**Movie 6.** Asymmetry does not develop in the presence of BFA. Live time-lapse imaging of mitochondria (green) and DNA (blue) shows that mitochondria remain symmetrically distributed when spindle migration is prevented with 5  $\mu\text{M}$  BFA.

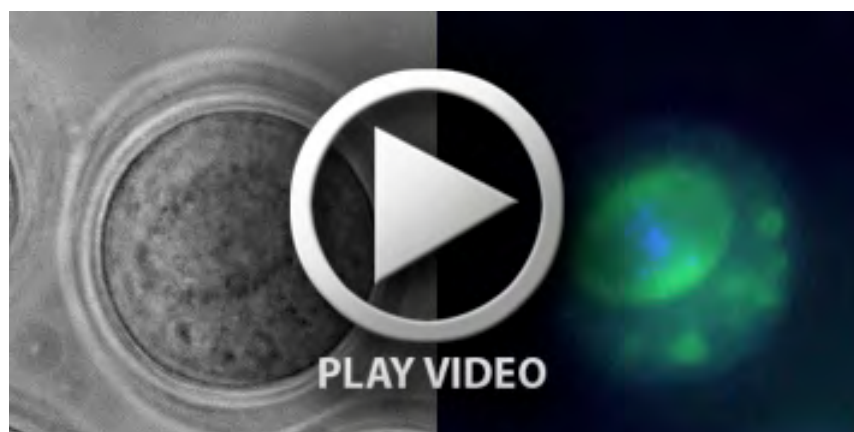

**Movie 7.** Asymmetry does not develop in the presence of MG132. Live time-lapse imaging of mitochondria (green) and DNA (blue) shows that mitochondria remain symmetrically distributed when the cell cycle is arrested at metaphase with 50  $\mu\text{M}$  MG132.

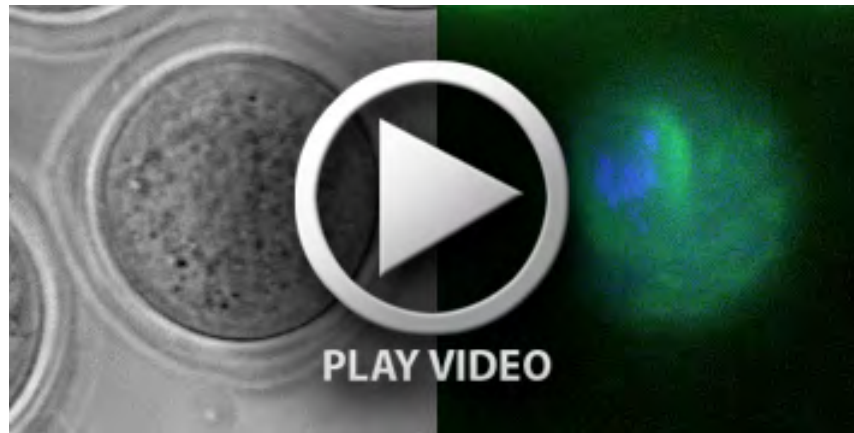

**Movie 8.** Mitochondrial asymmetry can be restored by MG132 washout. Live time-lapse imaging of mitochondria (green) and DNA (blue) shows that wash out of MG132 allows the cell cycle to resume and mitochondrial asymmetry initiates at anaphase as in control oocytes.

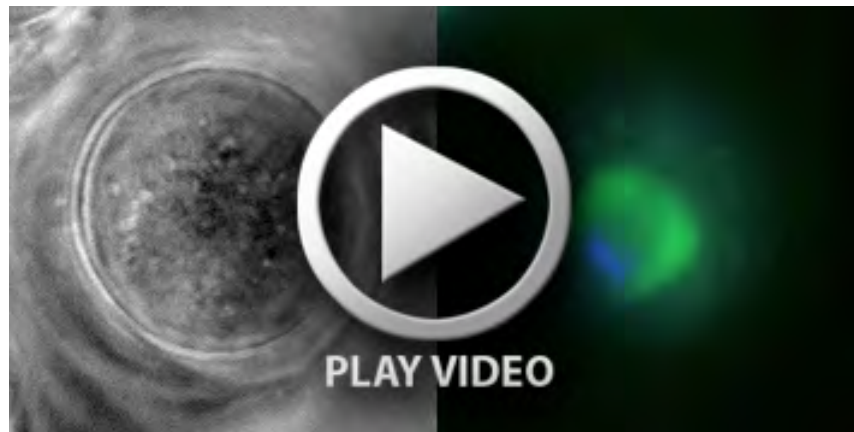

**Movie 9.** Mitochondria accumulate around the second meiotic spindle. Live time-lapse imaging of mitochondria (green) and DNA (blue) shows that mitochondria accumulate around the forming second meiotic spindle after extrusion of the first polar body.
